# Supplementary material for: Prediabetes Is Associated With Structural Brain Abnormalities: The Maastricht Study
Source: Oxford University Press journal article supplement (doi:10.2337/dc18-1132), 2018-10-16

SUPPLEMENTARY DATA

**PREDIABETES IS ASSOCIATED WITH STRUCTURAL BRAIN ABNORMALITIES:  
THE MAASTRICHT STUDY**

Marnix JM van Agtmaal<sup>1,2</sup>, Alfons JHM Houben<sup>1,2</sup>, Vera de Wit<sup>1</sup>, Ronald MA Henry<sup>1,2,3</sup>, Nicolaas C Schaper<sup>1,2</sup>,  
Pieter C Dagnelie<sup>1,4,5</sup>, Carla J van der Kallen<sup>1,2</sup>, Annemarie Koster<sup>4,6</sup>, Simone J Sep<sup>4,7</sup>, Abraham A. Kroon<sup>1,2</sup>,  
Jacobus FA Jansen<sup>8</sup>, Paul A Hofman<sup>8</sup>, Walter H Backes<sup>8,9</sup>, Miranda T Schram<sup>\*1,2,3</sup>,  
Coen DA Stehouwer<sup>\*1,2</sup>

<sup>1</sup>Department of Internal Medicine, <sup>2</sup>School for Cardiovascular Disease (CARIM), <sup>3</sup>Heart and Vascular Center, <sup>4</sup>Care and Public Health Research Institute (CAPHRI), <sup>5</sup>Department of Epidemiology, <sup>6</sup>Department of Social Medicine, <sup>7</sup>Department of Rehabilitation Medicine, <sup>8</sup>Department of Radiology & Nuclear Medicine, <sup>9</sup>School for Mental Health & Neuroscience; Maastricht University Medical Center (MUMC+), Maastricht, the Netherlands  
\* Both authors contributed equally

Supplementary Figure 1. Flowchart of the study population

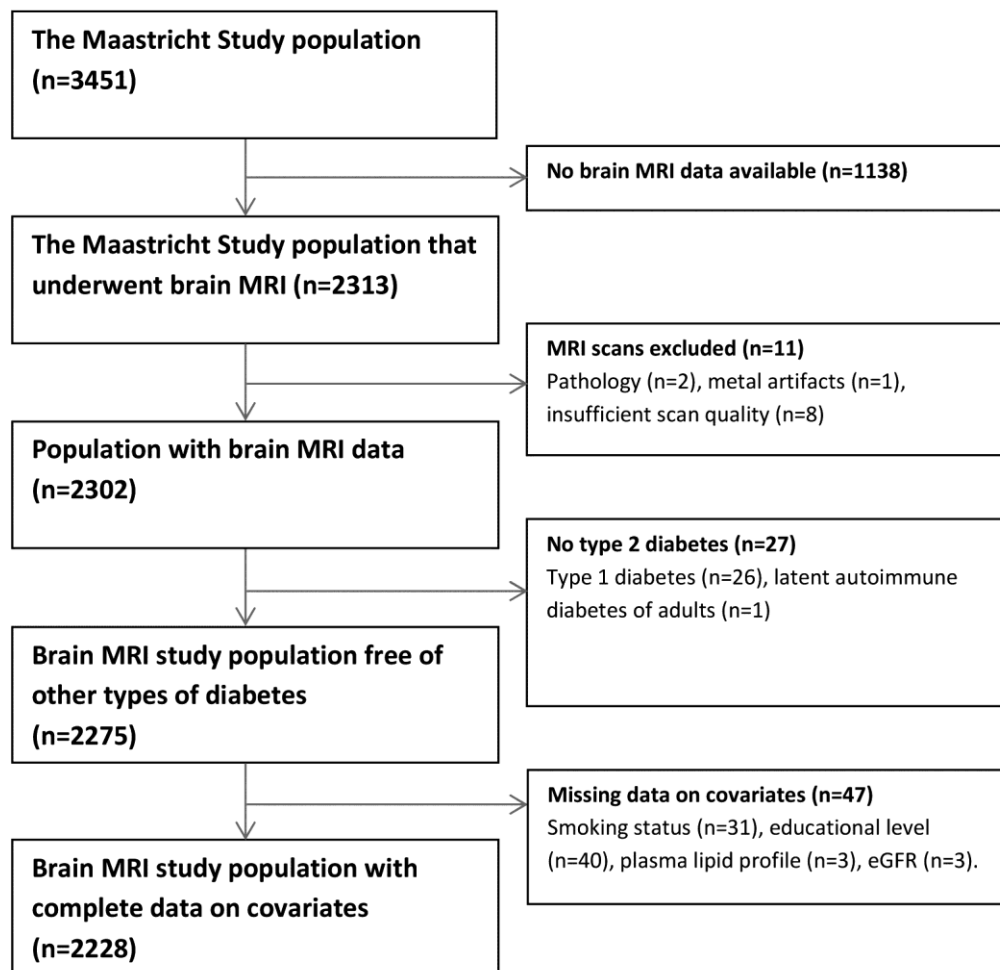

SUPPLEMENTARY DATA

**Supplementary Table 1.** General characteristics of the study population with and without brain MRI data.

| Characteristic                         | Study population (n=2228) | No brain MRI data available (n=1138) | P value |
|----------------------------------------|---------------------------|--------------------------------------|---------|
| <b>Demographics</b>                    |                           |                                      |         |
| Age (years)                            | 59.1 ± 8.2                | 61.0 ± 8.1                           | <0.001  |
| Sex (% female)                         | 48.3                      | 48.9                                 | 0.81    |
| <b>Glucose metabolism</b>              |                           |                                      |         |
| Type 2 diabetes (%)                    | 22.8                      | 39.1                                 | <0.001  |
| Fasting glucose (mmol/l)               | 5.7 ± 1.1                 | 6.0 ± 1.2                            | <0.001  |
| 2h post-load glucose (mmol/l)          | 7.5 ± 4.0                 | 8.8 ± 4.6                            | <0.001  |
| HbA1c (perc)                           | 5.7 ± 0.6                 | 6.1 ± 1.0                            | <0.001  |
| HbA1c (mmol/mol)                       | 40.0 ± 8.8                | 43.4 ± 11.6                          | <0.001  |
| <b>Cardiovascular risk factors</b>     |                           |                                      |         |
| Body mass index (kg/m <sup>2</sup> )   | 26.4 ± 4.0                | 27.5 ± 4.6                           | <0.001  |
| Systolic BP (mmHg)                     | 133.3 ± 17.0              | 137.3 ± 19.7                         | 0.01    |
| Diastolic BP (mmHg)                    | 76.1 ± 9.8                | 76.5 ± 10.0                          | 0.37    |
| Hypertension (%)                       | 52.0                      | 64.7                                 | <0.001  |
| Total-to-HDL cholesterol               | 3.7 ± 1.2                 | 3.7 ± 1.1                            | 0.11    |
| Triglycerides (mmol/l)                 | 1.4 ± 0.8                 | 1.5 ± 0.9                            | <0.001  |
| eGFR (ml/min/1.73m <sup>2</sup> )      | 89.1 ± 13.9               | 81.0 ± 16.3                          | 0.08    |
| History of CVD (%)                     | 11.9                      | 26.5                                 | <0.001  |
| <b>Medication use</b>                  |                           |                                      |         |
| Antihypertensive medication (%)        | 34.7                      | 49.8                                 | <0.001  |
| Lipid-modifying medication (%)         | 30.1                      | 46.5                                 | <0.001  |
| <b>Life style factors</b>              |                           |                                      |         |
| Smoking, never/former/current (%)      | 37.3 / 51.1 / 11.6        | 29.3 / 52.9 / 17.8                   | <0.001  |
| Educational level, low/medium/high (%) | 30.0 / 29.1 / 40.9        | 40.7 / 26.3 / 32.9                   | <0.001  |

Data are presented as means ± standard deviation or percentage and stratified for availability of MRI data.

HbA1c indicates hemoglobin A1c; BP, blood pressure; HDL, high-density lipoprotein; eGFR, estimated glomerular filtration rate; CVD, cardiovascular disease.

## SUPPLEMENTARY DATA

**Supplementary Table 2.** Multivariable adjusted differences in structural brain abnormalities (in % intracranial volume) among individuals with normal glucose metabolism, prediabetes and type 2 diabetes.

| Characteristic                                     | Prediabetes $\beta$ (95%CI) | Type 2 diabetes $\beta$ (95%CI) | P for trend |
|----------------------------------------------------|-----------------------------|---------------------------------|-------------|
| <b>White matter volume (% intracranial volume)</b> |                             |                                 |             |
| Model 1                                            | -0.24 (-0.47 to -0.00)      | -0.43 (-0.64 to -0.21)          | <0.001      |
| Model 2                                            | -0.29 (-0.53 to -0.05)      | -0.49 (-0.72 to -0.27)          | <0.001      |
| <b>Gray matter volume (% intracranial volume)</b>  |                             |                                 |             |
| Model 1                                            | -0.05 (-0.28 to 0.18)       | -0.60 (-0.80 to -0.40)          | 0.004       |
| Model 2                                            | 0.00 (-0.23 to 0.23)        | -0.47 (-0.68 to -0.25)          | 0.052       |
| <b>Cerebrospinal fluid (% intracranial volume)</b> |                             |                                 |             |
| Model 1                                            | 0.26 (0.00 to 0.52)         | 0.96 (0.73 to 1.20)             | <0.001      |
| Model 2                                            | 0.26 (-0.01 to 0.52)        | 12.5 (0.64 to 1.15)             | <0.001      |

Regression coefficients ( $\beta$ ) indicate the mean difference (95% CI) in white matter hyperintensity, deep cortical hyperintensity and periventricular white matter hyperintensity volumes (in log<sub>10</sub>-transformed ml) or white matter, gray matter, and cerebrospinal fluid volumes (in % intracranial volume) of participants with prediabetes and type 2 diabetes, as compared to normal glucose metabolism.

CI indicates confidence interval

**Model 1:** adjusted for age, sex, intracranial volume, and time between baseline and MRI measurements **Model 2:** Model 1 additionally adjusted for body mass index, smoking status, total-to-high-density lipoprotein-cholesterol ratio, office systolic blood pressure, estimated glomerular filtration rate, and educational level.

SUPPLEMENTARY DATA

**Supplementary Table 3.** Multivariable adjusted associations of HbA1c, fasting glucose and 2-hour post-load glucose levels with structural brain abnormalities (in % intracranial volume).

| Model                                              | HbA1c st $\beta$ (95%CI) | P value | Fasting glucose st $\beta$ (95%CI) | P value | 2h post-load glucose* st $\beta$ (95%CI) | P value |
|----------------------------------------------------|--------------------------|---------|------------------------------------|---------|------------------------------------------|---------|
| <b>White matter volume (% intracranial volume)</b> |                          |         |                                    |         |                                          |         |
| Model 1                                            | -0.06 (-0.10 to -0.02)   | 0.002   | -0.07 (-0.12 to -0.03)             | <0.001  | -0.10 (-0.14 to -0.06)                   | <0.001  |
| Model 2                                            | -0.06 (-0.11 to -0.02)   | 0.005   | -0.08 (-0.12 to -0.03)             | 0.001   | -0.11 (-0.15 to -0.06)                   | <0.001  |
| <b>Gray matter volume (% intracranial volume)</b>  |                          |         |                                    |         |                                          |         |
| Model 1                                            | -0.06 (-0.10 to -0.03)   | 0.001   | -0.06 (-0.09 to -0.02)             | 0.004   | -0.02 (-0.05 to 0.02)                    | 0.399   |
| Model 2                                            | -0.05 (-0.09 to -0.01)   | 0.012   | -0.04 (-0.08 to 0.00)              | 0.037   | -0.01 (-0.05 to 0.03)                    | 0.548   |
| <b>Cerebrospinal fluid (% intracranial volume)</b> |                          |         |                                    |         |                                          |         |
| Model 1                                            | 0.10 (0.06 to 0.13)      | <0.001  | 0.10 (0.06 to 0.14)                | <0.001  | 0.09 (0.05 to 0.12)                      | <0.001  |
| Model 2                                            | 0.09 (0.05 to 0.12)      | <0.001  | 0.09 (0.05 to 0.13)                | <0.001  | 0.09 (0.05 to 0.12)                      | <0.001  |

Point estimates (standardized betas) and 95% CIs indicate the mean difference in white matter hyperintensity, deep cortical hyperintensity and periventricular white matter hyperintensity volumes (in log<sub>10</sub>-transformed ml) per SD increase in HbA1c, fasting glucose, or 2h post-load glucose levels.

CI indicates confidence interval; HbA1c, hemoglobin A1c; SD, standard deviation, st $\beta$ , standardized beta.

**Model 1:** adjustment for age, sex, intracranial volume, and time between baseline and MRI measurements

**Model 2:** Model 1 additionally adjusted for body mass index, smoking status, total-to-high-density lipoprotein-cholesterol ratio, office systolic blood pressure, estimated glomerular filtration rate, and educational level.

## SUPPLEMENTARY DATA

**Supplementary Table 4.** Multivariable adjusted differences in structural brain abnormalities in individuals with normal glucose metabolism, prediabetes and type 2 diabetes, adjusted for 24h systolic blood pressure.

| Characteristic                                                                                  | Prediabetes OR (95% CI) | Type 2 diabetes OR (95% CI) | P for trend |
|-------------------------------------------------------------------------------------------------|-------------------------|-----------------------------|-------------|
| <b>Markers of cerebral small vessel disease</b>                                                 |                         |                             |             |
| <i>Lacunar infarctions (yes/no), OR (95% CI)</i>                                                |                         |                             |             |
| Model 1                                                                                         | 1.80 (1.08 to 3.00)     | 1.85 (1.17 to 2.91)         | 0.006       |
| Model 2                                                                                         | 1.80 (1.07 to 3.02)     | 1.82 (1.10 to 3.00)         | 0.014       |
| Model 3                                                                                         | 1.69 (1.00 to 2.86)     | 1.49 (0.87 to 2.54)         | 0.115       |
| <i>Total white matter hyperintensity volume (log-ml), <math>\beta</math> (95% CI)</i>           |                         |                             |             |
| Model 1                                                                                         | 0.11 (0.03 to 0.18)     | 0.21 (0.15 to 0.28)         | <0.001      |
| Model 2                                                                                         | 0.10 (0.03 to 0.18)     | 0.20 (0.13 to 0.28)         | <0.001      |
| Model 3                                                                                         | 0.09 (0.01 to 0.17)     | 0.14 (0.07 to 0.22)         | <0.001      |
| <i>Deep cortical white matter hyperintensity volume (log-ml), <math>\beta</math> (95% CI)</i>   |                         |                             |             |
| Model 1                                                                                         | 0.10 (0.02 to 0.19)     | 0.16 (0.09 to 0.24)         | <0.001      |
| Model 2                                                                                         | 0.10 (0.01 to 0.18)     | 0.15 (0.07 to 0.23)         | <0.001      |
| Model 3                                                                                         | 0.08 (-0.01 to 0.16)    | 0.08 (-0.01 to 0.17)        | 0.040       |
| <i>Periventricular white matter hyperintensity volume (log-ml), <math>\beta</math> (95% CI)</i> |                         |                             |             |
| Model 1                                                                                         | 0.10 (0.02 to 0.17)     | 0.21 (0.15 to 0.27)         | <0.001      |
| Model 2                                                                                         | 0.09 (0.02 to 0.16)     | 0.20 (0.13 to 0.27)         | <0.001      |
| Model 3                                                                                         | 0.08 (0.01 to 0.15)     | 0.15 (0.08 to 0.23)         | <0.001      |
| <i>Cerebral microbleeds (yes/no), OR (95% CI)</i>                                               |                         |                             |             |
| Model 1                                                                                         | 0.93 (0.61 to 1.39)     | 1.09 (0.77 to 1.54)         | 0.686       |
| Model 2                                                                                         | 0.92 (0.60 to 1.39)     | 1.05 (0.72 to 1.53)         | 0.869       |
| Model 3                                                                                         | 0.93 (0.61 to 1.42)     | 1.10 (0.73 to 1.66)         | 0.725       |
| <b>Brain volumes</b>                                                                            |                         |                             |             |
| <i>White matter volume (ml), <math>\beta</math> (95% CI)</i>                                    |                         |                             |             |
| Model 1                                                                                         | -2.4 (-6.0 to 1.1)      | -6.2 (-9.3 to -3.0)         | <0.001      |
| Model 2                                                                                         | -3.3 (-6.9 to 0.3)      | -7.5 (-10.9 to -4.1)        | <0.001      |
| Model 3                                                                                         | -3.3 (-6.9 to 0.3)      | -7.4 (-11.1 to -3.8)        | <0.001      |
| <i>Gray matter volume (ml), <math>\beta</math> (95% CI)</i>                                     |                         |                             |             |
| Model 1                                                                                         | -0.6 (-4.1 to 2.8)      | -7.1 (-10.2 to -4.0)        | <0.001      |
| Model 2                                                                                         | -0.1 (-3.6 to 3.4)      | -5.5 (-8.8 to -2.2)         | 0.002       |
| Model 3                                                                                         | 0.7 (-2.8 to 4.2)       | -3.2 (-6.8 to 0.3)          | 0.123       |
| <i>Cerebrospinal fluid (ml), <math>\beta</math> (95% CI)</i>                                    |                         |                             |             |
| Model 1                                                                                         | 2.6 (-1.4 to 6.5)       | 12.5 (9.0 to 16.0)          | <0.001      |
| Model 2                                                                                         | 2.8 (-1.2 to 6.8)       | 12.2 (8.4 to 16.0)          | <0.001      |
| Model 3                                                                                         | 2.2 (-1.8 to 6.2)       | 10.2 (6.1 to 14.3)          | <0.001      |

Associations between prediabetes and type 2 diabetes with structural brain abnormalities in the study population. Odds ratios with 95% CI represent the risk of the presence of lacunar infarctions or cerebral microbleeds, and regression coefficients indicate the mean difference with 95% CI in total white matter hyperintensity, deep cortical hyperintensity, and periventricular white matter hyperintensity volumes (in log<sub>10</sub>-transformed ml) or white matter, gray matter, and cerebrospinal fluid volumes (in ml) of participants with prediabetes or type 2 diabetes, as compared to normal glucose metabolism.

OR indicates odds ratio; CI, confidence interval

**Model 1:** adjusted for age, sex, and time between baseline and MRI measurements

**Model 2:** Model 1 additionally adjusted for body mass index, smoking status, total-to-high-density lipoprotein-cholesterol ratio, 24h systolic blood pressure\*, estimated glomerular filtration rate, and educational level.

**Model 3:** Model 2 additionally adjusted for the use of blood pressure-lowering and lipid-modifying medication

## SUPPLEMENTARY DATA

\* Note that 24h ambulatory blood pressure was available in n=1984 (1229 individuals with normal glucose metabolism, 303 with prediabetes, and 452 with type 2 diabetes).

SUPPLEMENTARY DATA

**Supplementary Table 5.** Multivariable adjusted associations, including 24h systolic blood pressure, of HbA1c, fasting glucose, and 2-hour post-load glucose levels with structural brain abnormalities.

| Model                                                                                           | HbA1c                  | P value | Fasting glucose        | P value | 2h post-load glucose   | P value |
|-------------------------------------------------------------------------------------------------|------------------------|---------|------------------------|---------|------------------------|---------|
| <b>Markers of cerebral small vessel disease</b>                                                 |                        |         |                        |         |                        |         |
| <i>Lacunar infarctions (yes/no), OR (95% CI)</i>                                                |                        |         |                        |         |                        |         |
| Model 1                                                                                         | 1.30 (1.11 to 1.53)    | 0.001   | 1.25 (1.06 to 1.48)    | 0.010   | 1.24 (1.04 to 1.47)    | 0.016   |
| Model 2                                                                                         | 1.29 (1.08 to 1.54)    | 0.005   | 1.25 (1.03 to 1.50)    | 0.021   | 1.26 (1.05 to 1.51)    | 0.015   |
| Model 3                                                                                         | 1.21 (1.00 to 1.47)    | 0.048   | 1.17 (0.96 to 1.43)    | 0.119   | 1.17 (0.96 to 1.42)    | 0.123   |
| <i>Total white matter hyperintensity volume (log-ml), <math>\beta</math> (95% CI)</i>           |                        |         |                        |         |                        |         |
| Model 1                                                                                         | 0.10 (0.06 to 0.14)    | <0.001  | 0.12 (0.08 to 0.16)    | <0.001  | 0.11 (0.07 to 0.15)    | <0.001  |
| Model 2                                                                                         | 0.08 (0.04 to 0.13)    | <0.001  | 0.11 (0.07 to 0.15)    | <0.001  | 0.10 (0.06 to 0.14)    | <0.001  |
| Model 3                                                                                         | 0.05 (0.00 to 0.09)    | 0.037   | 0.08 (0.04 to 0.13)    | 0.001   | 0.07 (0.03 to 0.12)    | 0.001   |
| <i>Deep cortical white matter hyperintensity volume (log-ml), <math>\beta</math> (95% CI)</i>   |                        |         |                        |         |                        |         |
| Model 1                                                                                         | 0.06 (0.02 to 0.10)    | <0.001  | 0.08 (0.04 to 0.12)    | <0.001  | 0.06 (0.02 to 0.10)    | 0.007   |
| Model 2                                                                                         | 0.04 (0.00 to 0.08)    | 0.075   | 0.07 (0.03 to 0.12)    | 0.002   | 0.05 (0.01 to 0.10)    | 0.016   |
| Model 3                                                                                         | 0.00 (-0.05 to 0.05)   | 0.946   | 0.04 (-0.01 to 0.09)   | 0.116   | 0.02 (-0.03 to 0.06)   | 0.480   |
| <i>Periventricular white matter hyperintensity volume (log-ml), <math>\beta</math> (95% CI)</i> |                        |         |                        |         |                        |         |
| Model 1                                                                                         | 0.11 (0.07 to 0.15)    | <0.001  | 0.13 (0.09 to 0.18)    | <0.001  | 0.12 (0.08 to 0.16)    | <0.001  |
| Model 2                                                                                         | 0.10 (0.05 to 0.14)    | <0.001  | 0.13 (0.08 to 0.17)    | <0.001  | 0.12 (0.08 to 0.16)    | <0.001  |
| Model 3                                                                                         | 0.07 (0.02 to 0.11)    | 0.003   | 0.10 (0.05 to 0.15)    | <0.001  | 0.10 (0.05 to 0.14)    | <0.001  |
| <i>Cerebral microbleeds (yes/no), OR (95% CI)</i>                                               |                        |         |                        |         |                        |         |
| Model 1                                                                                         | 1.06 (0.92 to 1.23)    | 0.401   | 1.05 (0.90 to 1.22)    | 0.531   | 0.99 (0.86 to 1.15)    | 0.889   |
| Model 2                                                                                         | 1.05 (0.90 to 1.22)    | 0.546   | 1.04 (0.88 to 1.22)    | 0.674   | 0.99 (0.85 to 1.16)    | 0.929   |
| Model 3                                                                                         | 1.07 (0.91 to 1.26)    | 0.437   | 1.05 (0.89 to 1.25)    | 0.558   | 1.00 (0.85 to 1.18)    | 0.969   |
| <b>Brain volumes</b>                                                                            |                        |         |                        |         |                        |         |
| <i>White matter volume (ml), <math>\beta</math> (95% CI)</i>                                    |                        |         |                        |         |                        |         |
| Model 1                                                                                         | -0.02 (-0.04 to 0.00)  | 0.080   | -0.03 (-0.05 to -0.01) | 0.016   | -0.04 (-0.06 to -0.01) | 0.002   |
| Model 2                                                                                         | -0.03 (-0.05 to 0.00)  | 0.033   | -0.04 (-0.06 to -0.01) | 0.004   | -0.04 (-0.07 to -0.02) | <0.001  |
| Model 3                                                                                         | -0.02 (-0.04 to 0.01)  | 0.110   | -0.03 (-0.06 to -0.01) | 0.014   | -0.04 (-0.07 to -0.02) | 0.001   |
| <i>Gray matter volume (ml), <math>\beta</math> (95% CI)</i>                                     |                        |         |                        |         |                        |         |
| Model 1                                                                                         | -0.05 (-0.07 to -0.03) | <0.001  | -0.04 (-0.06 to -0.02) | <0.001  | -0.03 (-0.05 to -0.01) | 0.014   |
| Model 2                                                                                         | -0.04 (-0.06 to -0.01) | 0.002   | -0.03 (-0.06 to -0.01) | 0.006   | -0.02 (-0.04 to 0.00)  | 0.064   |
| Model 3                                                                                         | -0.02 (-0.05 to 0.00)  | 0.054   | -0.02 (-0.04 to 0.01)  | 0.132   | -0.01 (-0.03 to 0.02)  | 0.561   |
| <i>Cerebrospinal fluid (ml), <math>\beta</math> (95% CI)</i>                                    |                        |         |                        |         |                        |         |
| Model 1                                                                                         | 0.08 (0.05 to 0.11)    | <0.001  | 0.08 (0.05 to 0.11)    | <0.001  | 0.07 (0.04 to 0.10)    | <0.001  |
| Model 2                                                                                         | 0.07 (0.04 to 0.10)    | <0.001  | 0.08 (0.05 to 0.11)    | <0.001  | 0.07 (0.04 to 0.11)    | <0.001  |
| Model 3                                                                                         | 0.05 (0.02 to 0.08)    | 0.004   | 0.06 (0.03 to 0.09)    | 0.001   | 0.06 (0.03 to 0.09)    | 0.001   |

Associations between continuous measures of glycemia with structural brain abnormalities in the study population. Odds ratios with 95% CI represent the risk of the presence of lacunar infarctions or cerebral microbleeds, and standardized betas and 95% CIs indicate the mean difference in white matter hyperintensity, deep cortical hyperintensity and periventricular white matter hyperintensity volumes (in log<sub>10</sub>-transformed ml) or white matter, gray matter, and cerebrospinal fluid volumes (in ml), per SD increase in HbA1c, fasting plasma glucose, or 2h post-load glucose.

CI indicates confidence interval; HbA1c, hemoglobin A1c; SD, standard deviation, st $\beta$ , standardized beta.

**Model 1:** adjustment for age, sex, intracranial volume, and time between baseline and MRI measurements

**Model 2:** Model 1 additionally adjusted for body mass index, smoking status, total-to-high-density lipoprotein-cholesterol ratio, 24h systolic blood pressure<sup>#</sup>, estimated glomerular filtration rate, and educational level.

**Model 3:** Model 2 additionally adjusted for the use of blood pressure-lowering and lipid-modifying medication

## SUPPLEMENTARY DATA

# Note that 24h ambulatory blood pressure was available in n=1984 (1229 individuals with normal glucose metabolism, 303 with prediabetes, and 452 with type 2 diabetes).



## SUPPLEMENTARY DATA

**Supplementary Table 6.** Multivariable adjusted differences in structural brain abnormalities among individuals with normal glucose metabolism, prediabetes and type 2 diabetes, additionally adjusted for eGFR < 60 mL/min/1.73m<sup>2</sup> and urinary albumin excretion > 30 mg/24 hours.

| Characteristic                                                                                  | Prediabetes OR (95% CI) | Type 2 diabetes OR (95% CI) | P for trend |
|-------------------------------------------------------------------------------------------------|-------------------------|-----------------------------|-------------|
| <b>Markers of cerebral small vessel disease</b>                                                 |                         |                             |             |
| <i>Lacunar infarctions (yes/no), OR (95% CI)</i>                                                |                         |                             |             |
| Model 1                                                                                         | 1.65 (0.99 to 2.75)     | 1.79 (1.14 to 2.81)         | 0.010       |
| Model 2                                                                                         | 1.62 (0.97 to 2.73)     | 1.73 (1.05 to 2.83)         | 0.026       |
| Model 3                                                                                         | 1.62 (0.97 to 2.73)     | 1.74 (1.05 to 2.88)         | 0.025       |
| <i>Total white matter hyperintensity volume (log-ml), <math>\beta</math> (95% CI)</i>           |                         |                             |             |
| Model 1                                                                                         | 0.09 (0.01 to 0.16)     | 0.22 (0.16 to 0.29)         | <0.001      |
| Model 2                                                                                         | 0.08 (0.01 to 0.16)     | 0.21 (0.13 to 0.28)         | <0.001      |
| Model 3                                                                                         | 0.08 (0.01 to 0.16)     | 0.19 (0.12 to 0.26)         | <0.001      |
| <i>Deep cortical white matter hyperintensity volume (log-ml), <math>\beta</math> (95% CI)</i>   |                         |                             |             |
| Model 1                                                                                         | 0.09 (0.01 to 0.17)     | 0.17 (0.10 to 0.25)         | <0.001      |
| Model 2                                                                                         | 0.08 (0.00 to 0.16)     | 0.16 (0.08 to 0.24)         | <0.001      |
| Model 3                                                                                         | 0.08 (0.00 to 0.16)     | 0.14 (0.06 to 0.22)         | 0.001       |
| <i>Periventricular white matter hyperintensity volume (log-ml), <math>\beta</math> (95% CI)</i> |                         |                             |             |
| Model 1                                                                                         | 0.08 (0.01 to 0.14)     | 0.21 (0.15 to 0.28)         | <0.001      |
| Model 2                                                                                         | 0.07 (0.00 to 0.14)     | 0.20 (0.13 to 0.27)         | <0.001      |
| Model 3                                                                                         | 0.07 (0.00 to 0.14)     | 0.18 (0.12 to 0.25)         | <0.001      |
| <i>Cerebral microbleeds (yes/no), OR (95% CI)</i>                                               |                         |                             |             |
| Model 1                                                                                         | 0.86 (0.58 to 1.28)     | 1.16 (0.83 to 1.28)         | 0.471       |
| Model 2                                                                                         | 0.87 (0.58 to 1.30)     | 1.16 (0.81 to 1.67)         | 0.511       |
| Model 3                                                                                         | 0.87 (0.58 to 1.30)     | 1.13 (0.78 to 1.64)         | 0.616       |
| <b>Brain volumes</b>                                                                            |                         |                             |             |
| <i>White matter volume (ml), <math>\beta</math> (95% CI)</i>                                    |                         |                             |             |
| Model 1                                                                                         | -3.4 (-6.8 to -0.1)     | -6.1 (-9.2 to -3.1)         | <0.001      |
| Model 2                                                                                         | -4.3 (-7.6 to -0.8)     | -7.7 (-11.0 to -4.4)        | <0.001      |
| Model 3                                                                                         | -4.2 (-7.6 to -0.8)     | -6.7 (-10.1 to -3.4)        | <0.001      |
| <i>Gray matter volume (ml), <math>\beta</math> (95% CI)</i>                                     |                         |                             |             |
| Model 1                                                                                         | -1.1 (-4.4 to 2.3)      | -8.0 (-11.0 to -4.9)        | <0.001      |
| Model 2                                                                                         | -0.4 (-3.8 to 2.9)      | -6.0 (-9.2 to -2.7)         | 0.001       |
| Model 3                                                                                         | -0.4 (-3.8 to 2.9)      | -5.5 (-8.8 to -2.3)         | 0.002       |
| <i>Cerebrospinal fluid (ml), <math>\beta</math> (95% CI)</i>                                    |                         |                             |             |
| Model 1                                                                                         | 4.1 (0.2 to 7.9)        | 13.2 (9.7 to 16.7)          | <0.001      |
| Model 2                                                                                         | 4.2 (0.3 to 8.0)        | 12.7 (9.0 to 16.4)          | <0.001      |
| Model 3                                                                                         | 4.1 (0.3 to 8.0)        | 11.4 (7.7 to 15.2)          | <0.001      |

Associations between prediabetes and type 2 diabetes with structural brain abnormalities in the study population. Odds ratios with 95% CI represent the risk of the presence of lacunar infarctions or cerebral microbleeds, and regression coefficients indicate the mean difference with 95% CI in total white matter hyperintensity, deep cortical hyperintensity, and periventricular white matter hyperintensity volumes (in log<sub>10</sub>-transformed ml) or white matter, gray matter, and cerebrospinal fluid volumes (in ml) of participants with prediabetes or type 2 diabetes, as compared to normal glucose metabolism.

OR indicates odds ratio; CI indicates confidence interval

**Model 1:** adjusted for age, sex, and time between baseline and MRI measurements

**Model 2:** Model 1 additionally adjusted for body mass index, smoking status, total-to-high-density lipoprotein-cholesterol ratio, office systolic blood pressure, estimated glomerular filtration rate, and educational level.

## SUPPLEMENTARY DATA

**Model 3:** Model 2 additionally adjusted for eGFR < 60 mL/min/1.73m<sup>2</sup> and urinary albumin excretion > 30 mg/24 hours\*

\* Note that urinary albumin excretion values were available in n=2060

## SUPPLEMENTARY DATA

**Supplementary Table 7.** Multivariable adjusted associations of HbA1c, fasting glucose and 2-hour post-load glucose levels with structural brain abnormalities, additionally adjusted for eGFR<60 mL/min/1.73m<sup>2</sup> and urinary albumin excretion > 30 mg/24 hours.

| Model                                                                          | HbA1c                  | P value | Fasting glucose        | P value | 2h post-load glucose   | P value |
|--------------------------------------------------------------------------------|------------------------|---------|------------------------|---------|------------------------|---------|
| <b>Markers of cerebral small vessel disease</b>                                |                        |         |                        |         |                        |         |
| <i>Lacunar infarctions (yes/no), OR (95% CI)</i>                               |                        |         |                        |         |                        |         |
| Model 1                                                                        | 1.32 (1.13 to 1.53)    | <0.001  | 1.26 (1.07 to 1.47)    | 0.004   | 1.22 (1.02 to 1.45)    | 0.027   |
| Model 2                                                                        | 1.31 (1.11 to 1.54)    | 0.002   | 1.24 (1.05 to 1.48)    | 0.014   | 1.24 (1.03 to 1.50)    | 0.022   |
| Model 3                                                                        | 1.31 (1.11 to 1.56)    | 0.002   | 1.25 (1.05 to 1.50)    | 0.014   | 1.26 (1.05 to 1.52)    | 0.016   |
| <i>Total white matter hyperintensity volume (log-ml), β (95% CI)</i>           |                        |         |                        |         |                        |         |
| Model 1                                                                        | 0.10 (0.06 to 0.14)    | <0.001  | 0.11 (0.08 to 0.15)    | <0.001  | 0.11 (0.07 to 0.15)    | <0.001  |
| Model 2                                                                        | 0.08 (0.04 to 0.13)    | <0.001  | 0.10 (0.06 to 0.15)    | <0.001  | 0.11 (0.07 to 0.15)    | <0.001  |
| Model 3                                                                        | 0.07 (0.03 to 0.12)    | 0.001   | 0.09 (0.05 to 0.14)    | <0.001  | 0.10 (0.06 to 0.14)    | <0.001  |
| <i>Deep cortical white matter hyperintensity volume (log-ml), β (95% CI)</i>   |                        |         |                        |         |                        |         |
| Model 1                                                                        | 0.06 (0.02 to 0.11)    | 0.002   | 0.08 (0.04 to 0.12)    | <0.001  | 0.07 (0.03 to 0.11)    | 0.001   |
| Model 2                                                                        | 0.05 (0.01 to 0.09)    | 0.019   | 0.07 (0.03 to 0.12)    | 0.001   | 0.06 (0.02 to 0.10)    | 0.006   |
| Model 3                                                                        | 0.04 (-0.01 to 0.08)   | 0.091   | 0.06 (0.01 to 0.10)    | 0.010   | 0.05 (0.01 to 0.10)    | 0.021   |
| <i>Periventricular white matter hyperintensity volume (log-ml), β (95% CI)</i> |                        |         |                        |         |                        |         |
| Model 1                                                                        | 0.11 (0.07 to 0.15)    | <0.001  | 0.12 (0.09 to 0.16)    | <0.001  | 0.13 (0.09 to 0.17)    | <0.001  |
| Model 2                                                                        | 0.09 (0.05 to 0.14)    | <0.001  | 0.12 (0.07 to 0.16)    | <0.001  | 0.12 (0.08 to 0.16)    | <0.001  |
| Model 3                                                                        | 0.09 (0.04 to 0.13)    | <0.001  | 0.11 (0.06 to 0.15)    | <0.001  | 0.11 (0.07 to 0.16)    | <0.001  |
| <i>Cerebral microbleeds (yes/no), OR (95% CI)</i>                              |                        |         |                        |         |                        |         |
| Model 1                                                                        | 1.05 (0.92 to 1.20)    | 0.492   | 1.05 (0.92 to 1.21)    | 0.460   | 0.97 (0.84 to 1.13)    | 0.717   |
| Model 2                                                                        | 1.05 (0.90 to 1.21)    | 0.543   | 1.05 (0.91 to 1.22)    | 0.490   | 0.98 (0.84 to 1.14)    | 0.804   |
| Model 3                                                                        | 1.03 (0.89 to 1.20)    | 0.661   | 1.04 (0.89 to 1.21)    | 0.619   | 0.98 (0.84 to 1.14)    | 0.777   |
| <b>Brain volumes</b>                                                           |                        |         |                        |         |                        |         |
| <i>White matter volume (ml), β (95% CI)</i>                                    |                        |         |                        |         |                        |         |
| Model 1                                                                        | -0.02 (-0.04 to 0.00)  | 0.121   | -0.02 (-0.04 to 0.00)  | 0.060   | -0.04 (-0.06 to -0.01) | 0.002   |
| Model 2                                                                        | -0.02 (-0.04 to 0.00)  | 0.054   | -0.03 (-0.05 to 0.00)  | 0.020   | -0.04 (-0.07 to -0.02) | <0.001  |
| Model 3                                                                        | -0.02 (-0.04 to 0.01)  | 0.177   | -0.02 (-0.04 to 0.00)  | 0.099   | -0.04 (-0.06 to -0.02) | 0.001   |
| <i>Gray matter volume (ml), β (95% CI)</i>                                     |                        |         |                        |         |                        |         |
| Model 1                                                                        | -0.06 (-0.08 to -0.04) | <0.001  | -0.05 (-0.07 to -0.03) | <0.001  | -0.03 (-0.05 to -0.01) | 0.016   |
| Model 2                                                                        | -0.04 (-0.07 to -0.02) | <0.001  | -0.04 (-0.06 to -0.02) | <0.001  | -0.02 (-0.04 to 0.00)  | 0.068   |
| Model 3                                                                        | -0.04 (-0.06 to -0.02) | <0.001  | -0.04 (-0.06 to 0.01)  | 0.002   | -0.02 (-0.04 to 0.00)  | 0.097   |
| <i>Cerebrospinal fluid (ml), β (95% CI)</i>                                    |                        |         |                        |         |                        |         |
| Model 1                                                                        | 0.08 (0.05 to 0.11)    | <0.001  | 0.08 (0.05 to 0.11)    | <0.001  | 0.07 (0.04 to 0.10)    | <0.001  |
| Model 2                                                                        | 0.07 (0.04 to 0.11)    | <0.001  | 0.08 (0.04 to 0.11)    | <0.001  | 0.07 (0.04 to 0.10)    | <0.001  |
| Model 3                                                                        | 0.06 (0.03 to 0.09)    | <0.001  | 0.06 (0.03 to 0.10)    | <0.001  | 0.07 (0.04 to 0.10)    | <0.001  |

Associations between continuous measures of glycemia with structural brain abnormalities in the study population. Odds ratios with 95% CI represent the risk of the presence of lacunar infarctions or cerebral microbleeds, and standardized betas and 95% CIs indicate the mean difference in white matter hyperintensity, deep cortical hyperintensity and periventricular white matter hyperintensity volumes (in log<sub>10</sub>-transformed ml) or white matter, gray matter, and cerebrospinal fluid volumes (in ml), per SD increase in HbA1c, fasting plasma glucose, or 2h post-load glucose.

OR indicates odds ratio; CI, confidence interval; HbA1c, hemoglobin A1c.

**Model 1:** adjustment for age, sex, intracranial volume, and time between baseline and MRI measurements

**Model 2:** Model 1 additionally adjusted for body mass index, smoking status, total-to-high-density lipoprotein-cholesterol ratio, 24h systolic blood pressure\*, estimated glomerular filtration rate, and educational level.

## SUPPLEMENTARY DATA

**Model 3:** Model 2 additionally adjusted for eGFR < 60 mL/min/1.73m<sup>2</sup> and urinary albumin excretion > 30 mg/24 hours\*

\* Note that urinary albumin excretion values were available in n=2107

## SUPPLEMENTARY DATA

**Supplementary Table 8.** Multivariable adjusted differences in structural brain abnormalities among individuals with normal glucose metabolism (HbA1c <5.7%), prediabetes (HbA1c 5.7 to <6.5%), and type 2 diabetes (HbA1c ≥6.5%), based on ADA criteria (5).

| Characteristic                                                                 | Prediabetes OR (95% CI) | Type 2 diabetes OR (95% CI) | P for trend |
|--------------------------------------------------------------------------------|-------------------------|-----------------------------|-------------|
| <b>Markers of cerebral small vessel disease</b>                                |                         |                             |             |
| <i>Lacunar infarctions (yes/no), OR (95% CI)</i>                               |                         |                             |             |
| Model 1                                                                        | 1.27 (0.82 to 1.96)     | 1.71 (1.07 to 2.74)         | 0.026       |
| Model 2                                                                        | 1.23 (0.79 to 1.91)     | 1.64 (0.99 to 2.72)         | 0.059       |
| <i>Total white matter hyperintensity volume (log-ml), β (95% CI)</i>           |                         |                             |             |
| Model 1                                                                        | 0.11 (0.05 to 0.17)     | 0.24 (0.17 to 0.32)         | <0.001      |
| Model 2                                                                        | 0.10 (0.04 to 0.16)     | 0.22 (0.15 to 0.30)         | <0.001      |
| <i>Deep cortical white matter hyperintensity volume (log-ml), β (95% CI)</i>   |                         |                             |             |
| Model 1                                                                        | 0.08 (0.02 to 0.15)     | 0.17 (0.09 to 0.25)         | <0.001      |
| Model 2                                                                        | 0.08 (0.01 to 0.14)     | 0.15 (0.06 to 0.23)         | <0.001      |
| <i>Periventricular white matter hyperintensity volume (log-ml), β (95% CI)</i> |                         |                             |             |
| Model 1                                                                        | 0.10 (0.04 to 0.15)     | 0.25 (0.18 to 0.32)         | <0.001      |
| Model 2                                                                        | 0.09 (0.04 to 0.15)     | 0.23 (0.16 to 0.30)         | <0.001      |
| <i>Cerebral microbleeds (yes/no), OR (95% CI)</i>                              |                         |                             |             |
| Model 1                                                                        | 0.88 (0.64 to 1.20)     | 1.04 (0.73 to 1.50)         | 0.984       |
| Model 2                                                                        | 0.87 (0.63 to 1.19)     | 1.01 (0.68 to 1.48)         | 0.830       |
| <b>Brain volumes</b>                                                           |                         |                             |             |
| <i>White matter volume (ml), β (95% CI)</i>                                    |                         |                             |             |
| Model 1                                                                        | 1.4 (-1.3 to 4.1)       | -5.6 (-9.0 to -2.3)         | 0.012       |
| Model 2                                                                        | 1.1 (-1.6 to -3.9)      | -5.6 (-9.0 to -2.3)         | 0.007       |
| <i>Gray matter volume (ml), β (95% CI)</i>                                     |                         |                             |             |
| Model 1                                                                        | -1.7 (-4.4 to 0.9)      | -7.2 (-10.5 to -3.9)        | <0.001      |
| Model 2                                                                        | -1.2 (-3.8 to 1.5)      | -4.9 (-8.4 to -1.2)         | 0.009       |
| <i>Cerebrospinal fluid (ml), β (95% CI)</i>                                    |                         |                             |             |
| Model 1                                                                        | 0.0 (-3.0 to 3.1)       | 11.9 (8.2 to 15.7)          | <0.001      |
| Model 2                                                                        | -0.3 (-3.4 to 2.7)      | 10.3 (6.3 to 14.3)          | <0.001      |

Associations between prediabetes and type 2 diabetes with structural brain abnormalities in the study population. Odds ratios with 95% CI represent the risk of the presence of lacunar infarctions or cerebral microbleeds, and regression coefficients indicate the mean difference with 95% CI in total white matter hyperintensity, deep cortical hyperintensity, and periventricular white matter hyperintensity volumes (in log<sub>10</sub>-transformed ml) or white matter, gray matter, and cerebrospinal fluid volumes (in ml) of participants with prediabetes or type 2 diabetes, as compared to normal glucose metabolism.

OR indicates odds ratio; CI, confidence interval

**Model 1:** adjusted for age, sex, and time between baseline and MRI measurements

**Model 2:** Model 1 additionally adjusted for body mass index, smoking status, total-to-high-density lipoprotein-cholesterol ratio, office systolic blood pressure, estimated glomerular filtration rate, and educational level.

## SUPPLEMENTARY DATA

**Supplementary Table 9.** Multivariable adjusted differences in structural brain abnormalities in individuals with normal glucose metabolism, prediabetes and type 2 diabetes, excluding participants with a lagtime > 1 year (n=1333).

| Characteristic                                                                                  | Prediabetes OR (95% CI) | Type 2 diabetes OR (95% CI) | P for trend |
|-------------------------------------------------------------------------------------------------|-------------------------|-----------------------------|-------------|
| <b>Markers of cerebral small vessel disease</b>                                                 |                         |                             |             |
| <i>Lacunar infarctions (yes/no), OR (95% CI)</i>                                                |                         |                             |             |
| Model 1                                                                                         | 1.71 (0.80 to 3.65)     | 1.25 (0.63 to 2.47)         | 0.468       |
| Model 2                                                                                         | 1.56 (0.72 to 3.39)     | 1.07 (0.51 to 2.26)         | 0.807       |
| <i>Total white matter hyperintensity volume (log-ml), <math>\beta</math> (95% CI)</i>           |                         |                             |             |
| Model 1                                                                                         | 0.05 (-0.06 to 0.17)    | 0.27 (0.17 to 0.36)         | <0.001      |
| Model 2                                                                                         | 0.05 (-0.07 to 0.16)    | 0.25 (0.14 to 0.35)         | <0.001      |
| <i>Deep cortical white matter hyperintensity volume (log-ml), <math>\beta</math> (95% CI)</i>   |                         |                             |             |
| Model 1                                                                                         | 0.05 (-0.07 to 0.18)    | 0.22 (0.11 to 0.33)         | <0.001      |
| Model 2                                                                                         | 0.04 (-0.08 to 0.17)    | 0.19 (0.08 to 0.31)         | 0.001       |
| <i>Periventricular white matter hyperintensity volume (log-ml), <math>\beta</math> (95% CI)</i> |                         |                             |             |
| Model 1                                                                                         | 0.05 (-0.06 to 0.16)    | 0.26 (0.17 to 0.35)         | <0.001      |
| Model 2                                                                                         | 0.04 (-0.07 to 0.15)    | 0.24 (0.14 to 0.34)         | <0.001      |
| <i>Cerebral microbleeds (yes/no), OR (95% CI)</i>                                               |                         |                             |             |
| Model 1                                                                                         | 1.06 (0.57 to 2.00)     | 1.33 (0.81 to 2.18)         | 0.276       |
| Model 2                                                                                         | 1.17 (0.62 to 2.18)     | 1.55 (0.90 to 2.65)         | 0.119       |
| <b>Brain volumes</b>                                                                            |                         |                             |             |
| <i>White matter volume (ml), <math>\beta</math> (95% CI)</i>                                    |                         |                             |             |
| Model 1                                                                                         | -5.6 (-10.8 to -0.3)    | -7.3 (-11.8 to -2.9)        | 0.001       |
| Model 2                                                                                         | -6.3 (-11.6 to -1.0)    | -8.7 (-13.5 to -3.9)        | <0.001      |
| <i>Gray matter volume (ml), <math>\beta</math> (95% CI)</i>                                     |                         |                             |             |
| Model 1                                                                                         | 0.1 (-4.8 to 5.0)       | -9.3 (-13.4 to -5.1)        | <0.001      |
| Model 2                                                                                         | 1.3 (-3.6 to 6.3)       | -6.5 (-11.0 to -2.1)        | 0.006       |
| <i>Cerebrospinal fluid (ml), <math>\beta</math> (95% CI)</i>                                    |                         |                             |             |
| Model 1                                                                                         | 5.3 (-0.4 to 11.0)      | 15.8 (11.0 to 20.8)         | <0.001      |
| Model 2                                                                                         | 4.9 (-0.9 to 10.6)      | 14.4 (9.2 to 19.6)          | <0.001      |

Associations between prediabetes and type 2 diabetes with structural brain abnormalities in the study population. Odds ratios with 95% CI represent the risk of the presence of lacunar infarctions or cerebral microbleeds, and regression coefficients indicate the mean difference with 95% CI in total white matter hyperintensity, deep cortical hyperintensity, and periventricular white matter hyperintensity volumes (in log<sub>10</sub>-transformed ml) or white matter, gray matter, and cerebrospinal fluid volumes (in ml) of participants with prediabetes or type 2 diabetes, as compared to normal glucose metabolism.

OR indicates odds ratio; CI, confidence interval

**Model 1:** adjusted for age, sex, and time between baseline and MRI measurements

**Model 2:** Model 1 additionally adjusted for body mass index, smoking status, total-to-high-density lipoprotein-cholesterol ratio, 24h systolic blood pressure\*, estimated glomerular filtration rate, and educational level.

## SUPPLEMENTARY DATA

**Supplementary Figure 2.** Scatterplots with regression lines on the associations of HbA1c, fasting glucose and 2-hour post-load glucose levels with white matter abnormalities.

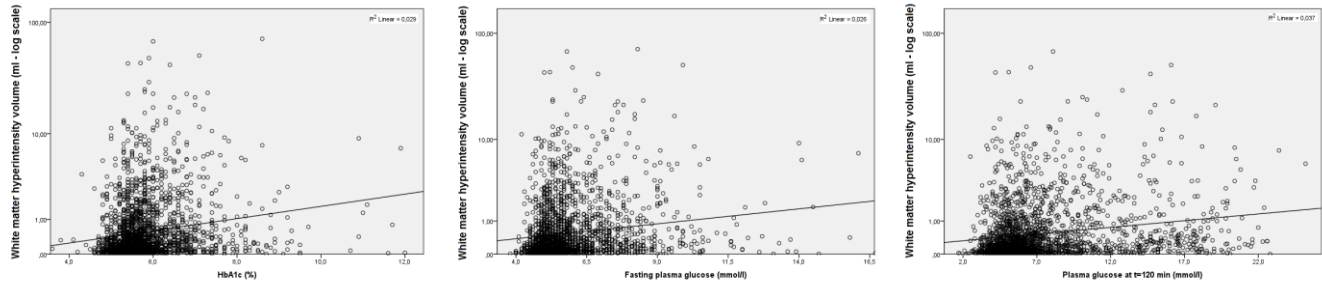

Supplement: dc181132supplementarydata.pdf [file dc181132supplementarydata.pdf]
